# Supplementary material for: A STAT3-NFkB/DDIT3/CEBPβ axis modulates ALDH1A3 expression in chemoresistant cell subpopulations
Source: PubMed Central journal article supplement (PMC4494963; doi:10.18632/oncotarget.3703), 2015-03-30
Supplement: oncotarget-06-12637-s001.pdf [file oncotarget-06-12637-s001.pdf]

# A STAT3-NFkB/DDIT3/CEBPβ axis modulates ALDH1A3 expression in chemoresistant cell subpopulations

## Supplementary Material

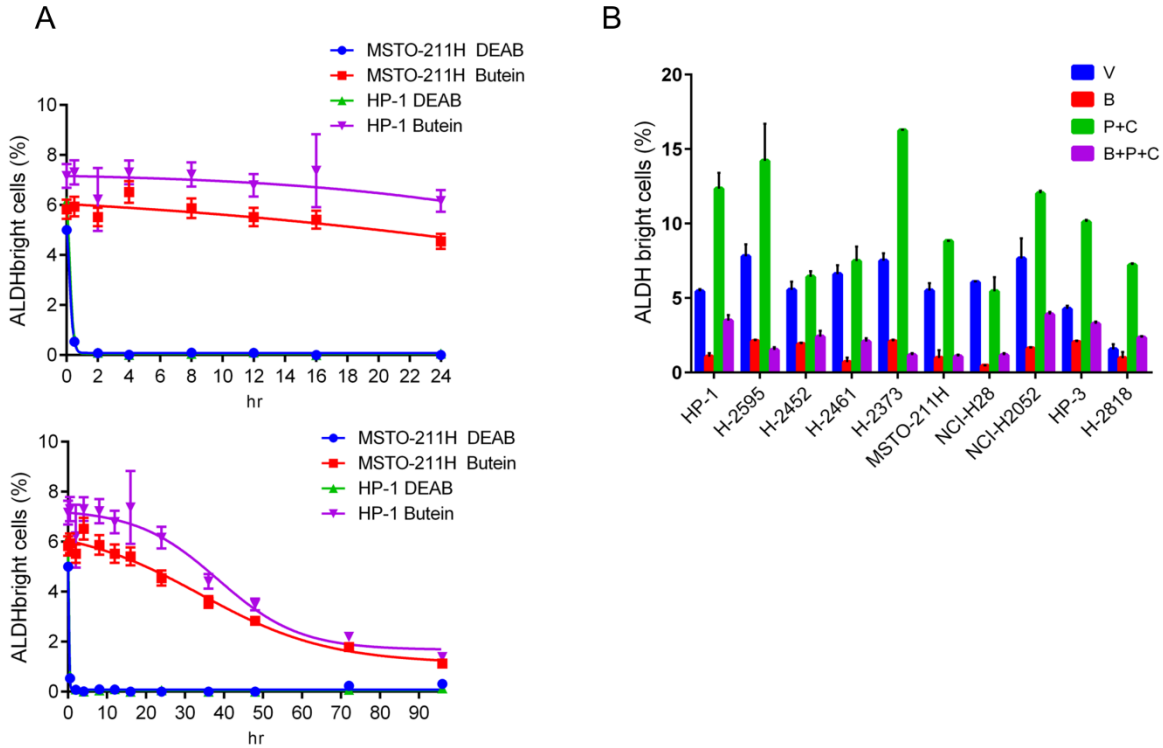

**Suppl. Fig. 1: Butein affects the ALDH<sup>bright</sup> cell number in MPM cell cultures. A. Butein does not inhibit the ALDH enzyme.** Graph showing the number of ALDH<sup>bright</sup> cells in time (0-90h) after treatment with butein or DEAB (diethylaminobenzaldehyde, 5 μM), a specific ALDH inhibitor. Average and s.e.m of triplicate experiments. **B.** Histograms show the percentage of ALDH<sup>bright</sup> cells in the indicated MPM cell cultures treated for 24hrs with vehicle (V: DMSO 0.05%) and Butein (B: 18 μM), alone or in combination with pemetrexed + cisplatin (P+C: 10 μM + 5 μM, respectively) and stained for ALDH activity at 96hrs. The percentage of ALDH<sup>bright</sup> cells was determined over the same cells treated with a specific ALDH inhibitor (DEAB) immediately after adding the ALDH substrate (BAA). Average + s.e.m of triplicate experiments.

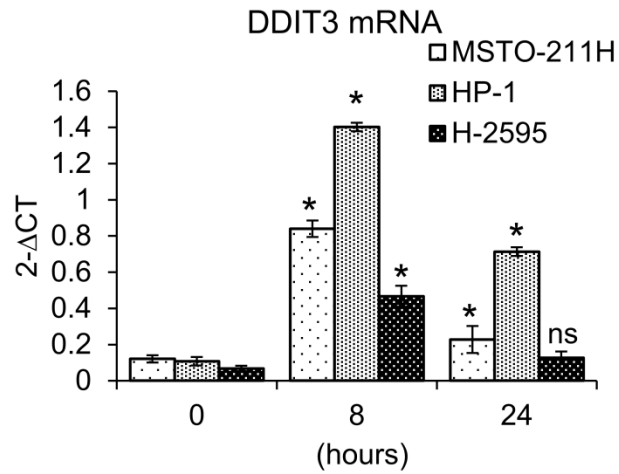

**Suppl. Fig. 2: Butein modulates the DDIT3 mRNA levels.** Quantitative PCR. DDIT3 mRNA levels of three representative MPM cell lines treated with butein (18 $\mu$ M) for the indicated times. Histogram bars represent the mean  $\pm$  s.e.m of  $\geq$  three experiments. Statistics:  $p < 0.05$ . Statistics: \*  $p < 0.05$ ; ns=not significant: ( $p > 0.05$ ). Student's t-test (comparing each sample to its control at 0hrs)

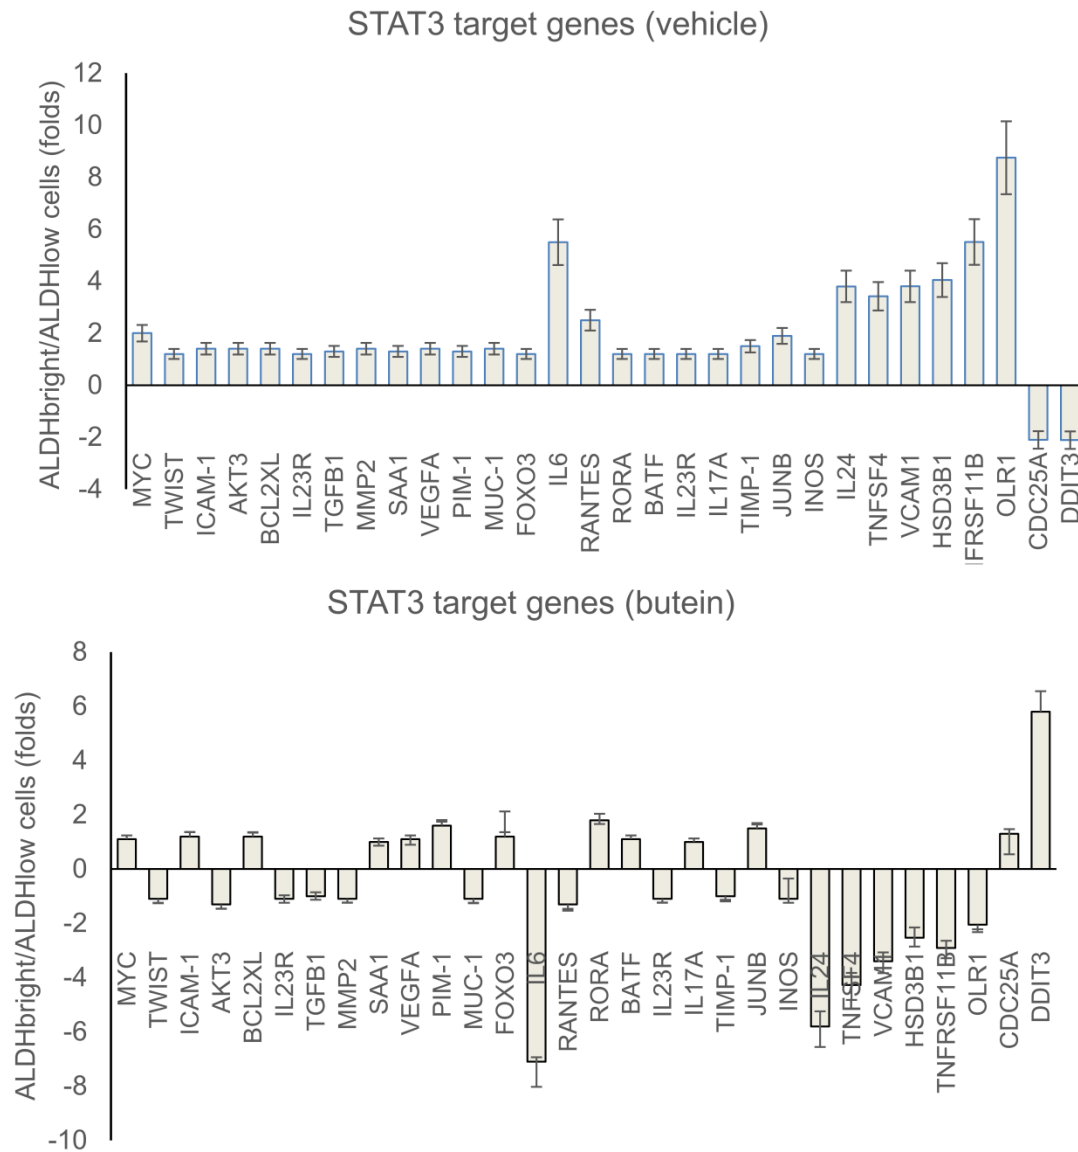

**Suppl. Fig. 3: Butein affects the levels of STAT3 target genes in ALDH<sup>bright</sup> and ALDH<sup>low</sup> cells.** mRNA levels of multiple STAT3 target genes in MSTO-211H ALDH<sup>bright</sup> vs ALDH<sup>low</sup> cells, upon treatment with vehicle (upper) or butein (18 μM) (lower) for 24hrs. Histogram bars show the average + s.e.m of duplicate experiments.
